# Supplementary material for: Pd–Pd/PdO as active sites on intercalated graphene oxide modified by diaminobenzene: fabrication, catalysis properties, synergistic effects, and catalytic mechanism
Source: Royal Society of Chemistry journal article supplement (doi:10.1039/d2ra00658h), 2022-01-01
Supplement: d2ra00658h1.pdf [file d2ra00658h1.pdf]

## Supporting Information

### **Pd-Pd/PdO as Active Sites on the Intercalated Graphene Oxide Modified by Aryl Diamino: Fabrication, Catalysis Property, Synergistic and Catalytic Mechanism**

Zihan Li<sup>a</sup>, Erran Song<sup>a</sup>, Ruirui Ren<sup>a</sup>, Wuduo Zhao<sup>a</sup>, Tiesheng Li<sup>a\*</sup>, Minghua Liu<sup>b\*</sup>, Yangjie Wu<sup>a</sup>

<sup>a</sup> College of Chemistry, Zhengzhou University, Zhengzhou 450001, Henan Province, PR China

<sup>b</sup> Beijing National Laboratory for Molecular Science, Institute of Chemistry, Chinese Academy of Sciences, Beijing 100190, PR China

### Contents

|                                 |          |
|---------------------------------|----------|
| <b>1. Figure captions</b> ----- | <b>2</b> |
| <b>2. Table lists</b> -----     | <b>5</b> |
| <b>3. Additive</b> -----        | <b>9</b> |

## 1. Figure caption

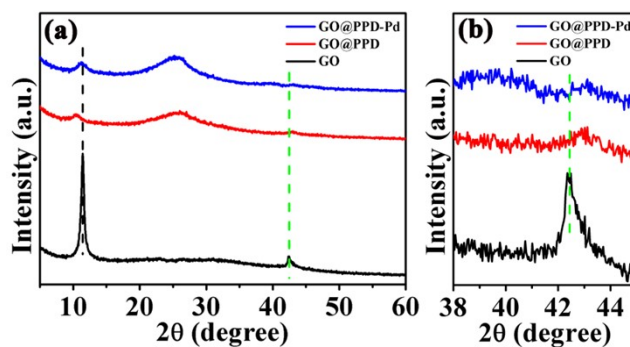

Figure S1 XRD patterns of GO, GO@PPD and GO@PPD-Pd.

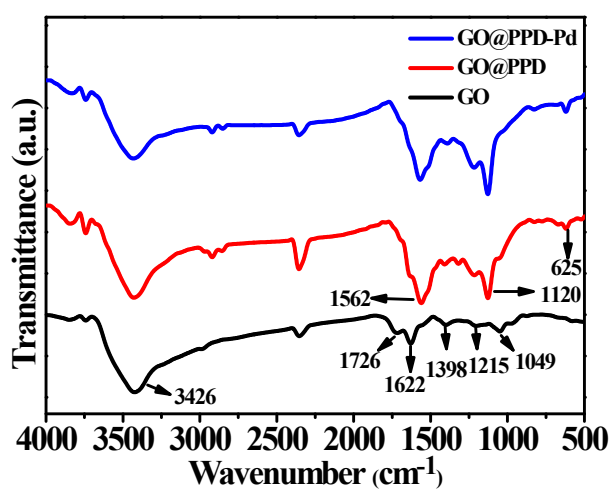

Figure S2 FT-IR spectra of GO, GO@PPD and GO@PPD-Pd.

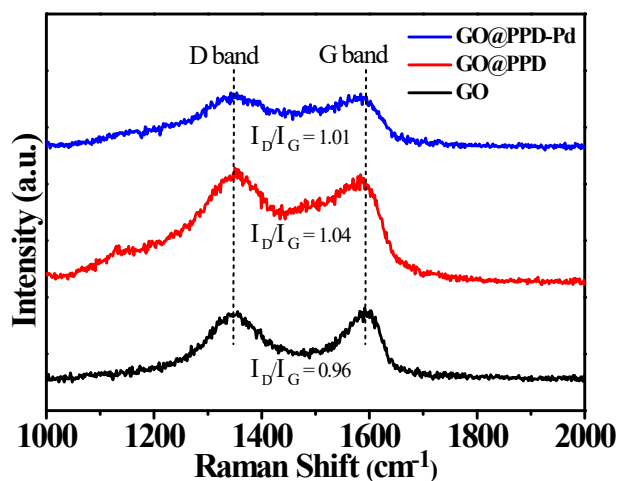

Figure S3. Raman spectrum of GO, GO@PPD and GO@PPD-Pd.

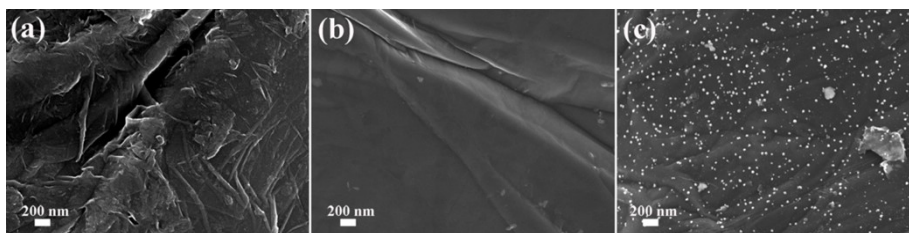

**Figure S4** SEM images: (a) GO, (b) GO@PPD, and (c) GO@PPD-Pd.

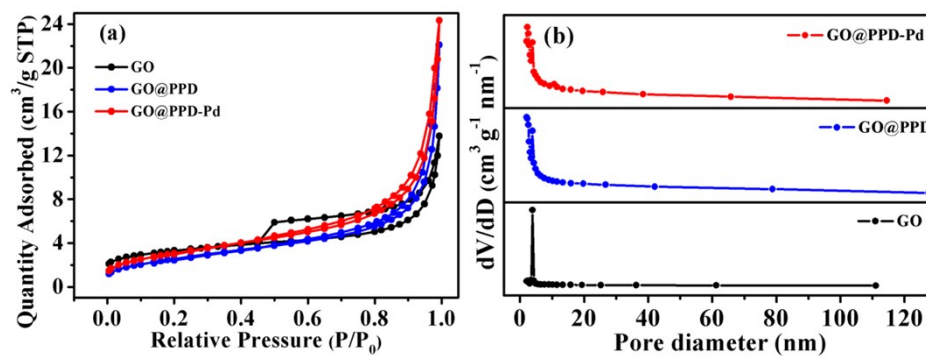

**Figure S5** (a)  $N_2$  adsorption-desorption isotherms, (b) the corresponding distribution of pore size for GO, GO@PPD and GO@PPD-Pd, respectively.

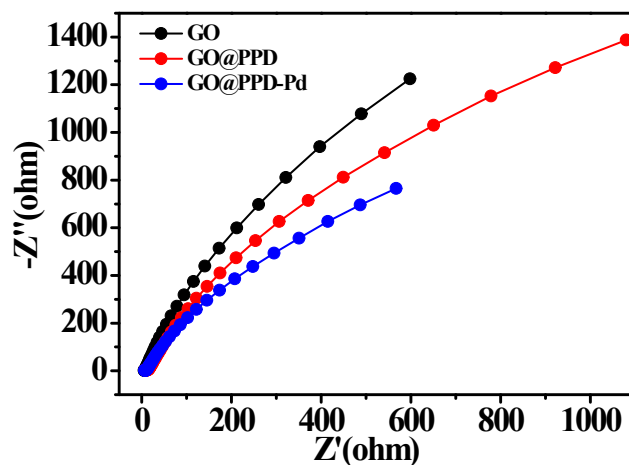

**Figure S6** Electrochemical impedance spectra (EIS) of the catalyst on the Ni foam for GO, GO@PPD and GO@PPD-Pd.

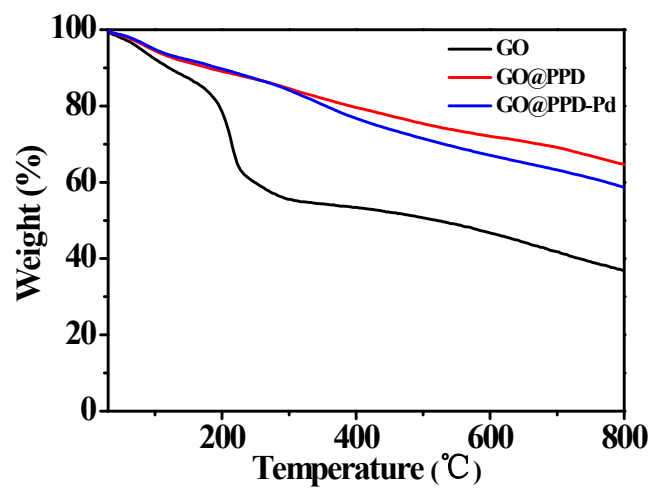

**Figure S7** Thermogravimetric analysis curves of GO, GO@PPD and GO@PPD-Pd.

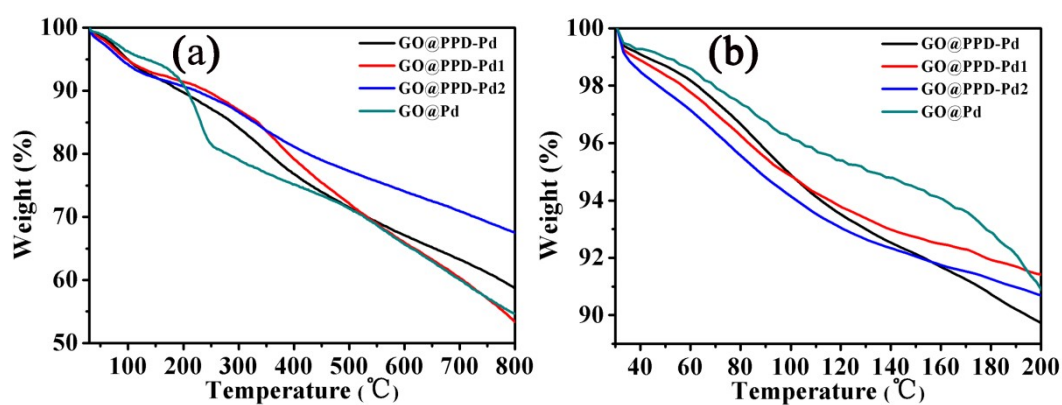

**Figure S8** (a) Thermogravimetric analysis curves of GO-PPD-Pd, GO@PPD-Pd1, GO@PPD-Pd2 and GO@Pd; (b) Amplified section from (a) in the range from 0 to 200 °C.

### 3. Table List

**Table S1.** BET surface areas, pore diameter and pore volumes of the catalysts.

| Catalyst  | S <sub>BET</sub> (m <sup>2</sup> g <sup>-1</sup> ) | Pore diameter (nm) | Pore volume (cm <sup>3</sup> g <sup>-1</sup> ) |
|-----------|----------------------------------------------------|--------------------|------------------------------------------------|
| GO        | 11.4524                                            | 7.7581             | 0.021552                                       |
| GO@PPD    | 9.5936                                             | 12.8325            | 0.035923                                       |
| GO@PPD-Pd | 11.3250                                            | 12.1393            | 0.039389                                       |

**Table S2.** Optimized conditions in Suzuki coupling reaction by GO@PPD-Pd.<sup>a</sup>

| Entry | Base                            | Solvent                    | Time (min) | T (°C) | Yield (%) <sup>b</sup> | TON <sup>e</sup> | TOF (h <sup>-1</sup> ) |
|-------|---------------------------------|----------------------------|------------|--------|------------------------|------------------|------------------------|
| 1     | K <sub>2</sub> CO <sub>3</sub>  | H <sub>2</sub> O           | 30         | 70     | 13                     | 765              | 1530                   |
| 2     | K <sub>2</sub> CO <sub>3</sub>  | MeOH                       | 30         | 70     | 53                     | 3118             | 6236                   |
| 3     | K <sub>2</sub> CO <sub>3</sub>  | EtOH                       | 30         | 70     | 91                     | 5353             | 10706                  |
| 4     | K <sub>2</sub> CO <sub>3</sub>  | H <sub>2</sub> O:EtOH(5:1) | 30         | 70     | 62                     | 3647             | 7294                   |
| 5     | K <sub>2</sub> CO <sub>3</sub>  | H <sub>2</sub> O:EtOH(4:1) | 30         | 70     | 67                     | 3941             | 7882                   |
| 6     | K <sub>2</sub> CO <sub>3</sub>  | H <sub>2</sub> O:EtOH(3:1) | 30         | 70     | 76                     | 4471             | 8942                   |
| 7     | K <sub>2</sub> CO <sub>3</sub>  | H <sub>2</sub> O:EtOH(2:1) | 30         | 70     | 89                     | 5235             | 10470                  |
| 8     | K <sub>2</sub> CO <sub>3</sub>  | H <sub>2</sub> O:EtOH(1:1) | 30         | 70     | 99                     | 5824             | 11648                  |
| 9     | K <sub>2</sub> CO <sub>3</sub>  | H <sub>2</sub> O:EtOH(1:2) | 30         | 70     | 92                     | 5412             | 10824                  |
| 10    | K <sub>2</sub> CO <sub>3</sub>  | H <sub>2</sub> O:EtOH(1:3) | 30         | 70     | 83                     | 4882             | 9764                   |
| 11    | Na <sub>2</sub> CO <sub>3</sub> | H <sub>2</sub> O:EtOH(1:1) | 30         | 70     | 91                     | 5353             | 10706                  |
| 12    | K <sub>3</sub> PO <sub>4</sub>  | H <sub>2</sub> O:EtOH(1:1) | 30         | 70     | 79                     | 4647             | 9294                   |
| 13    | NaOH                            | H <sub>2</sub> O:EtOH(1:1) | 30         | 70     | 94                     | 5530             | 11060                  |
| 14    | NaOAc                           | H <sub>2</sub> O:EtOH(1:1) | 30         | 70     | 92                     | 5412             | 10824                  |
| 15    | NaHCO <sub>3</sub>              | H <sub>2</sub> O:EtOH(1:1) | 30         | 70     | 85                     | 5000             | 10000                  |
| 16    | K <sub>2</sub> CO <sub>3</sub>  | H <sub>2</sub> O:EtOH(1:1) | 30         | 60     | 98                     | 5765             | 11530                  |
| 17    | K <sub>2</sub> CO <sub>3</sub>  | H <sub>2</sub> O:EtOH(1:1) | 30         | 50     | 94                     | 5530             | 11060                  |
| 18    | K <sub>2</sub> CO <sub>3</sub>  | H <sub>2</sub> O:EtOH(1:1) | 30         | 40     | 86                     | 5059             | 10118                  |
| 19    | K <sub>2</sub> CO <sub>3</sub>  | H <sub>2</sub> O:EtOH(1:1) | 30         | 30     | 76                     | 4471             | 8942                   |
| 20    | K <sub>2</sub> CO <sub>3</sub>  | H <sub>2</sub> O:EtOH(1:1) | 20         | 60     | 97                     | 5706             | 17118                  |

|    |                                |                            |    |    |                 |       |       |
|----|--------------------------------|----------------------------|----|----|-----------------|-------|-------|
| 21 | K <sub>2</sub> CO <sub>3</sub> | H <sub>2</sub> O:EtOH(1:1) | 10 | 60 | 90              | 5294  | 31764 |
| 22 | K <sub>2</sub> CO <sub>3</sub> | H <sub>2</sub> O:EtOH(1:1) | 20 | 60 | 91 <sup>c</sup> | 10706 | 32118 |
| 23 | K <sub>2</sub> CO <sub>3</sub> | H <sub>2</sub> O:EtOH(1:1) | 20 | 60 | 86 <sup>d</sup> | 20235 | 60705 |

<sup>a</sup> Reaction condition: *p*-bromotoluene (0.25 mmol), PhB(OH)<sub>2</sub> (0.3 mmol), Base (0.5 mmol), GO@PPD-Pd (1 mg), solvent (4 mL). <sup>b</sup> isolated yield. <sup>c</sup> 4-bromotoluene (0.5 mmol), PhB(OH)<sub>2</sub> (0.6 mmol), K<sub>2</sub>CO<sub>3</sub> (1 mmol). <sup>d</sup> *p*-bromotoluene (1 mmol), PhB(OH)<sub>2</sub> (1.2 mmol), K<sub>2</sub>CO<sub>3</sub> (2 mmol). <sup>e</sup> 1 mg GO@PPD-Pd containing 0.0000425 mmol Pd.

**Table S3.** Screening substrates of aryl halides with different aryl-boronic acid.<sup>a</sup>

| Entry | Ar-X                                                                                | Ar-B(OH) <sub>2</sub>                                                               | Product                                                                               | Yield (%) <sup>b</sup> |
|-------|-------------------------------------------------------------------------------------|-------------------------------------------------------------------------------------|---------------------------------------------------------------------------------------|------------------------|
| 1     |    |    |    | >99                    |
| 2     |    |    |     | >99                    |
| 3     |    |    |    | 99                     |
| 4     |  |  |   | 99                     |
| 5     |  |  |  | 99                     |
| 6     |  |  |   | 99                     |
| 7     |  |  |  | 99                     |
| 8     |  |  |  | 89                     |
| 9     |  |  |   | 99                     |
| 10    |  |  |  | 94                     |
| 11    |  |  |  | 70                     |
| 12    |  |  |  | trace                  |
| 13    |  |  |   | trace                  |

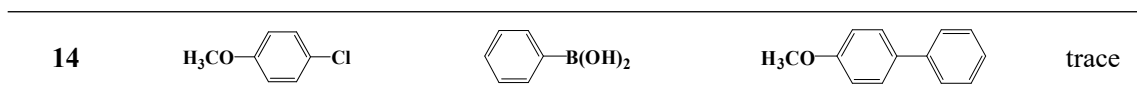

<sup>a</sup> Reaction condition: 4-bromotoluene (0.25 mmol), PhB(OH)<sub>2</sub> (0.3 mmol), K<sub>2</sub>CO<sub>3</sub> (0.5 mmol), GO@PPD-Pd (1 mg), solvent (50% aqueous alcohol 4 mL) at 60 °C for 20 min. <sup>b</sup> Isolated yield.

**Table S4.** Catalytic activity of GO@PPD-Pd, GO@PPD-Pd1, GO@PPD-Pd2 and GO@Pd for Suzuki-Miyaura reaction.<sup>a</sup>

| Catalyst   | Base                           | Solvent                    | Pd loading (mmol·mg <sup>-1</sup> ) | Yield (%) <sup>b</sup> | TON   | TOF (h <sup>-1</sup> ) |
|------------|--------------------------------|----------------------------|-------------------------------------|------------------------|-------|------------------------|
| GO@PPD-Pd  | K <sub>2</sub> CO <sub>3</sub> | H <sub>2</sub> O:EtOH(1:1) | 4.25×10 <sup>-5</sup>               | 97                     | 5706  | 17118                  |
| GO@PPD-Pd1 | K <sub>2</sub> CO <sub>3</sub> | H <sub>2</sub> O:EtOH(1:1) | 1.15×10 <sup>-5</sup>               | 85                     | 18478 | 55434                  |
| GO@PPD-Pd2 | K <sub>2</sub> CO <sub>3</sub> | H <sub>2</sub> O:EtOH(1:1) | 1.41×10 <sup>-4</sup>               | 99                     | 1755  | 5265                   |
| GO@Pd      | K <sub>2</sub> CO <sub>3</sub> | H <sub>2</sub> O:EtOH(1:1) | 2.92×10 <sup>-6</sup>               | 5                      | 4281  | 12843                  |

<sup>a</sup> Reaction condition: 4-bromotoluene (0.25 mmol), PhB(OH)<sub>2</sub> (0.3 mmol), K<sub>2</sub>CO<sub>3</sub> (0.5 mmol), catalyst 1 mg, solvent (50% aqueous alcohol 4 mL) at 60 °C for 20 min. <sup>b</sup> Isolated yield.

**Table S5.** Influences of support, ligand and the designed functional catalysts on catalytic properties.<sup>a</sup>

| Entry | Catalyst                                 | Pd loading (mmol) | Yield (%) <sup>b</sup> | TON  | TOF (h <sup>-1</sup> ) |
|-------|------------------------------------------|-------------------|------------------------|------|------------------------|
| 1     | GO                                       | 0                 | 0 <sup>c</sup>         | 0    | 0                      |
| 2     | PPD                                      | 0                 | 0 <sup>d</sup>         | 0    | 0                      |
| 3     | GO@PPD                                   | 0                 | 0 <sup>e</sup>         | 0    | 0                      |
| 4     | Li <sub>2</sub> PdCl <sub>4</sub>        | 0.0000425         | 76 <sup>f</sup>        | 4471 | 13413                  |
| 5     | GO+Li <sub>2</sub> PdCl <sub>4</sub>     | 0.0000425         | 64 <sup>g</sup>        | 3765 | 11295                  |
| 6     | PPD+Li <sub>2</sub> PdCl <sub>4</sub>    | 0.0000425         | trace <sup>h</sup>     | -    | -                      |
| 7     | GO@PPD+Li <sub>2</sub> PdCl <sub>4</sub> | 0.0000425         | 38 <sup>i</sup>        | 2235 | 6705                   |
| 8     | GO@PPD-Pd                                | 0.0000425         | 97 <sup>j</sup>        | 5706 | 17118                  |
| 9     | Si@PPD-Pd                                | 0.00025           | 90 <sup>k</sup>        | 900  | 2700                   |

<sup>a</sup> Reaction condition: 4-bromotoluene (0.25 mmol), PhB(OH)<sub>2</sub> (0.3 mmol), K<sub>2</sub>CO<sub>3</sub> (0.5 mmol), solvent (50% aqueous alcohol 4 mL) at 60 °C for 20 min. <sup>b</sup> Isolated yield. <sup>c</sup> GO 1 mg, <sup>d</sup> PPD 1 mg, <sup>e</sup> GO@PPD 1 mg, <sup>f</sup> Li<sub>2</sub>PdCl<sub>4</sub> 0.0000425 mmol, <sup>g</sup> GO 1 mg and Li<sub>2</sub>PdCl<sub>4</sub> 0.0000425 mmol, <sup>h</sup> PPD 1 mg and Li<sub>2</sub>PdCl<sub>4</sub> 0.0000425 mmol, <sup>i</sup> GO@PPD 1 mg and Li<sub>2</sub>PdCl<sub>4</sub> 0.0000425 mmol, <sup>j</sup> GO@PPD-Pd 1 mg containing 0.0000425 mmol Pd, <sup>k</sup> Si@PPD-Pd 1 mg containing 0.00025 mmol Pd.

**Table 6.** Influences of catalysts prepared with different ligands used to modified GO on catalytic performance.

| Entry | Ligand                     | Pd loading (mmol·mg <sup>-1</sup> ) | yield (%) | TON   | TOF(h <sup>-1</sup> ) |
|-------|----------------------------|-------------------------------------|-----------|-------|-----------------------|
| 1     | <i>p</i> -phenylenediamine | 4.25 × 10 <sup>-5</sup>             | 97        | 5706  | 17118                 |
| 2     | <i>m</i> -phenylenediamine | 1.57 × 10 <sup>-4</sup>             | 96        | 1529  | 4587                  |
| 3     | <i>o</i> -phenylenediamine | 1.12 × 10 <sup>-5</sup>             | 95        | 21205 | 63615                 |
| 4     | <i>p</i> -aminotoluene     | 6.51 × 10 <sup>-5</sup>             | 98        | 3764  | 11292                 |
| 5     | <i>p</i> -nitroaniline     | 1.74 × 10 <sup>-4</sup>             | 96        | 1379  | 4137                  |
| 6     | phenylamine                | 8.15 × 10 <sup>-5</sup>             | 97        | 2976  | 8928                  |
| 7     | 1,3-diaminopropane         | 8.57 × 10 <sup>-5</sup>             | 84        | 2451  | 7353                  |
| 8     | 1,6-diaminohexane          | 6.04 × 10 <sup>-5</sup>             | 75        | 3104  | 9312                  |

<sup>a</sup> Reaction condition: 4-bromotoluene (0.25 mmol), PhB(OH)<sub>2</sub> (0.3 mmol), K<sub>2</sub>CO<sub>3</sub> (0.5 mmol), catalyst 1 mg, solvent (50% aqueous alcohol 4 mL) at 60 °C for 20 min.

**Table S7.** Comparison of the similar Pd catalysts reported.

| Entry | Catalyst         | Reaction conditions                                                                                                                                                 | X              | Yield (%) | TOF (h <sup>-1</sup> ) | Ref       |
|-------|------------------|---------------------------------------------------------------------------------------------------------------------------------------------------------------------|----------------|-----------|------------------------|-----------|
| 1     | GO@PPD-Pd        | K <sub>2</sub> CO <sub>3</sub> , H <sub>2</sub> O:EtOH (1:1), 20 min, 60 °C                                                                                         | 4-bromotoluene | 97        | 17118                  | This work |
| 2     | ASNTs@Pd         | K <sub>2</sub> CO <sub>3</sub> , EtOH, 30 min, 80 °C                                                                                                                | Bromobenzene   | 99        | 3444                   | 24        |
| 3     | Pd/PRGO          | K <sub>2</sub> CO <sub>3</sub> , H <sub>2</sub> O:EtOH (1:1), 5 min, 120 °C                                                                                         | Bromobenzene   | 100       | 23000                  | 54        |
| 4     | F-GO-Pd          | K <sub>2</sub> CO <sub>3</sub> , H <sub>2</sub> O:EtOH (1:1), 20 min, 70 °C                                                                                         | Bromobenzene   | 97        | 21008                  | 78        |
| 5     | Pd@APGO          | K <sub>2</sub> CO <sub>3</sub> , H <sub>2</sub> O:EtOH (1:1), 6 h, 80 °C                                                                                            | Iodobenzene    | 96        | 68                     | 55        |
| 6     | Pd@GOF           | K <sub>2</sub> CO <sub>3</sub> , Toluene, 6 h, 80 °C                                                                                                                | Bromobenzene   | >99       | 8                      | 63        |
| 7     | Pd/RGO-0.025 PPD | K <sub>2</sub> CO <sub>3</sub> , H <sub>2</sub> O:EtOH (1:1), 15min, rt<br>(K <sub>2</sub> CO <sub>3</sub> , H <sub>2</sub> O:EtOH (1:1), 2min, under MWI at 80 °C) | Bromobenzene   | 95 (96.7) | 1740 (96,700)          | 52        |



|   |                                                     |                                                                            |              |     |      |    |
|---|-----------------------------------------------------|----------------------------------------------------------------------------|--------------|-----|------|----|
| 8 | DNA-G-Pd<br>(1.1 mol %)                             | K <sub>3</sub> PO <sub>4</sub> , H <sub>2</sub> O, SDS, 4min, 100 °C       | Iodobenzene  | 100 | 1363 | 56 |
| 9 | GO-NH <sub>2</sub> -Pd <sup>2+</sup><br>(1.0 mol %) | K <sub>2</sub> CO <sub>3</sub> , EtOH/H <sub>2</sub> O(2:1),<br>4 h, 60 °C | Bromobenzene | 73  | 1825 | 20 |

**Table S8.** Poisoning experiments of GO@PPD-Pd catalyst.<sup>a</sup>

| Entry | Poisoning additive | Yield (%) <sup>d</sup> |
|-------|--------------------|------------------------|
| 1     | -                  | 97                     |
| 2     | 2,2'-Dipyridyl     | 5 <sup>b</sup>         |
| 3     | Thiophene          | 31 <sup>c</sup>        |

<sup>a</sup> Reaction condition: 4-bromotoluene (0.25 mmol), PhB(OH)<sub>2</sub> (0.3 mmol), K<sub>2</sub>CO<sub>3</sub> (0.5 mmol), GO@PPD-Pd 1 mg, solvent (4 mL) at 60 °C for 20 min. <sup>b</sup> 0.5 equiv of 2,2'-Dipyridyl (per metal atom). <sup>c</sup> 0.5 equiv of Thiophene (per metal atom). <sup>d</sup> Isolated yield.

## Additive: Characterization of coupling compounds in Suzuki coupling reaction

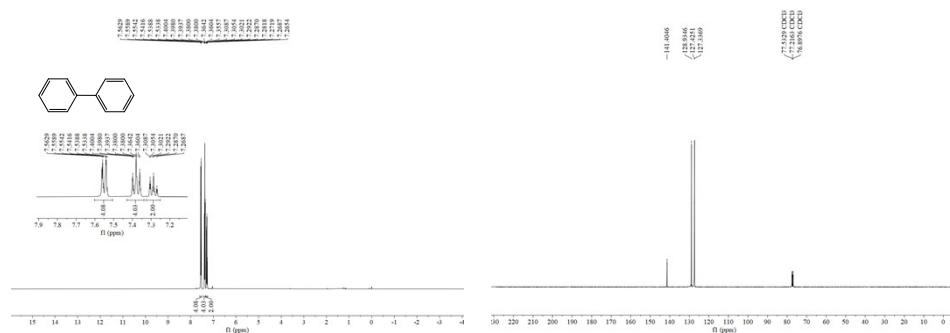

**Entry 1:** <sup>1</sup>H NMR (400 MHz, CDCl<sub>3</sub>) δ 7.55 (dt, *J* = 8.2, 1.8 Hz, 4H), 7.43 – 7.34 (m, 4H), 7.33 – 7.25 (m, 2H); <sup>13</sup>C NMR (101 MHz, CDCl<sub>3</sub>) δ 141.4, 128.9, 127.4, 127.3.

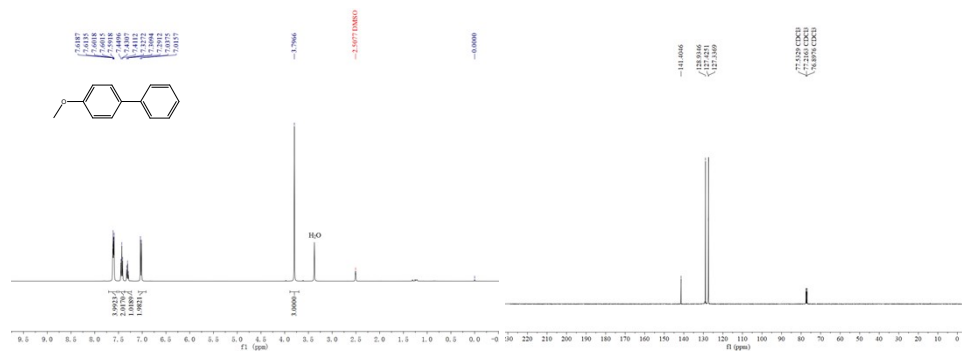

**Entry 2.** <sup>1</sup>H NMR (400MHz, DMSO, δ ppm): 7.47-7.45(m, 2H), 7.41-7.38(m, 2H), 7.30-7.36(m,

2H), 7.26-7.29(dd,  $J_2=1.8$  Hz,  $J_1=7.52$  Hz, 1H), 7.11-7.09(d,  $J=8.28$  Hz, 1H), 7.02(m, 1H), 3.75(s, 3H);  $^{13}\text{C}$  NMR (101 MHz,  $\text{CDCl}_3$ ,  $\delta$  ppm): 159.28, 140.94, 133.82, 128.84, 128.25, 126.81 (d,  $J = 7.1$  Hz), 114.31, 55.43.

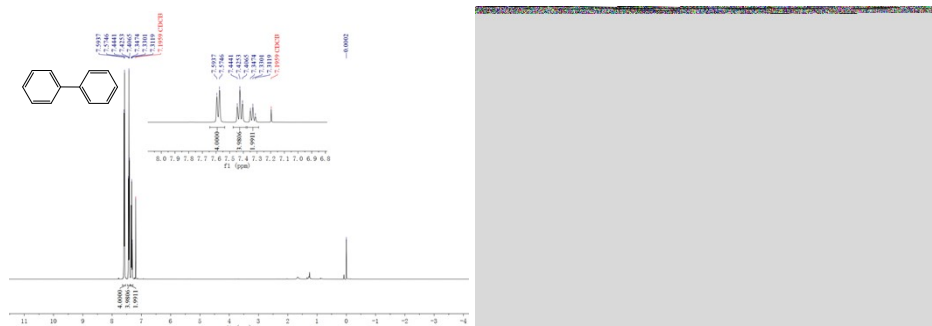

**Entry 3:**  $^1\text{H}$  NMR(400MHz, DMSO,  $\delta$  ppm): 7.59-7.57(d,  $J=7.64$  Hz, 4H), 7.44-7.40(t,  $J=7.52$ , 4H), 7.34-7.31(t,  $J=6.92$  Hz, 2H). ;  $^{13}\text{C}$  NMR (101 MHz,  $\text{CDCl}_3$ )  $\delta$  141.4, 128.9, 127.4, 127.3.

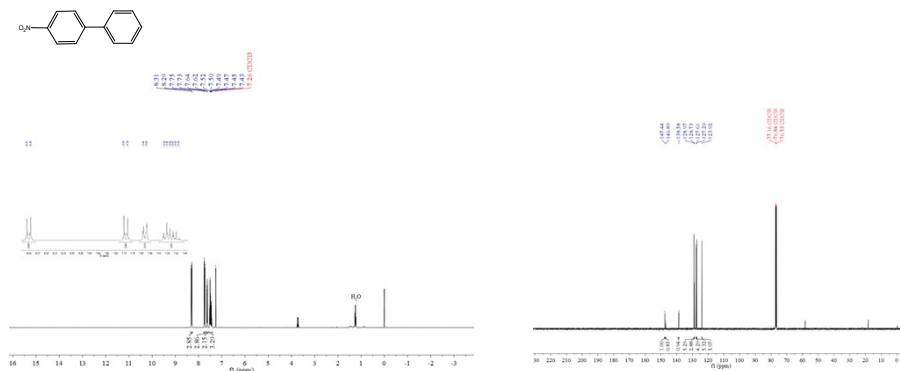

**Entry 4.**  $^1\text{H}$  NMR (400 MHz,  $\text{CDCl}_3$ ,  $\delta$  ppm): 7.41 – 7.55 (m, 3H), 7.63 (d,  $J = 6.8$  Hz, 2H), 7.74 (d,  $J = 8.8$  Hz, 2H), 8.30 (d,  $J = 8.8$  Hz, 2H).;  $^{13}\text{C}$  NMR (101 MHz,  $\text{CDCl}_3$ ,  $\delta$  ppm): 147.44 (1C), 146.89 (1C), 138.58 (1C), 128.97 (2C), 128.73 (1C), 127.61 (2C), 127.20 (2C), 123.92 (2C).

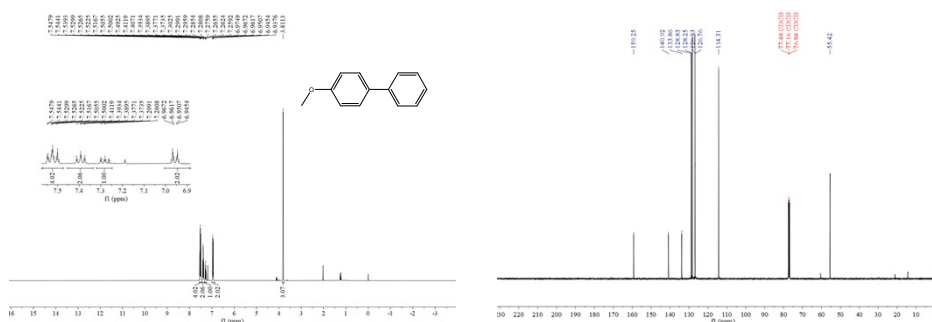

**Entry 6:**  $^1\text{H}$  NMR (400 MHz,  $\text{CDCl}_3$ ,  $\delta$  ppm) :7.61 – 7.47 (m, 4H), 7.39 (dd,  $J = 8.5, 6.9$  Hz, 2H), 7.32 – 7.24 (m, 1H), 7.00 – 6.92 (m, 2H), 3.81 (s, 3H).;  $^{13}\text{C}$  NMR (101 MHz,  $\text{CDCl}_3$ ,  $\delta$  ppm) :159.25, 140.92, 133.86, 128.83, 128.25, 126.80, 114.31, 55.42.

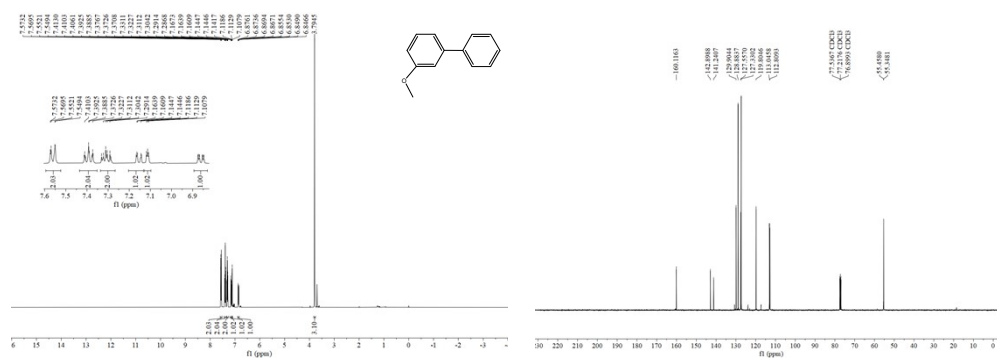

**Entry 7:**  $^1\text{H}$  NMR (400 MHz,  $\text{CDCl}_3$ )  $\delta$  7.56 (dd,  $J = 8.2, 1.3$  Hz, 2H), 7.39 (dd,  $J = 8.3, 6.7$  Hz, 2H), 7.34 – 7.26 (m, 2H), 7.20 – 7.13 (m, 1H), 7.12 – 7.10 (m, 1H), 6.86 (ddd,  $J = 8.2, 2.6, 1.0$  Hz, 1H), 3.79 (s, 3H);  $^{13}\text{C}$  NMR (101 MHz,  $\text{CDCl}_3$ )  $\delta$  160.1, 142.9, 141.2, 129.9, 128.9, 127.6, 127.3, 119.8, 113.0, 112.8, 55.3.

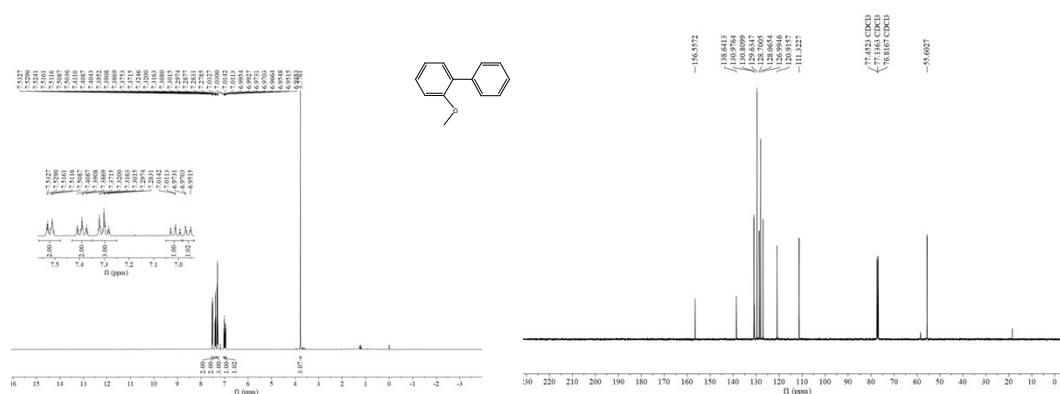

**Entry 8:**  $^1\text{H}$  NMR (400 MHz,  $\text{CDCl}_3$ )  $\delta$  7.56 – 7.48 (m, 2H), 7.43 – 7.34 (m, 2H), 7.30 (td,  $J = 7.5, 1.6$  Hz, 3H), 7.06 – 6.93 (m, 2H), 3.78 (s, 3H);  $^{13}\text{C}$  NMR (101 MHz,  $\text{CDCl}_3$ )  $\delta$  156.6, 138.6, 131.0, 130.8, 129.6, 128.7, 128.1, 127.0, 120.9, 111.3, 55.6.

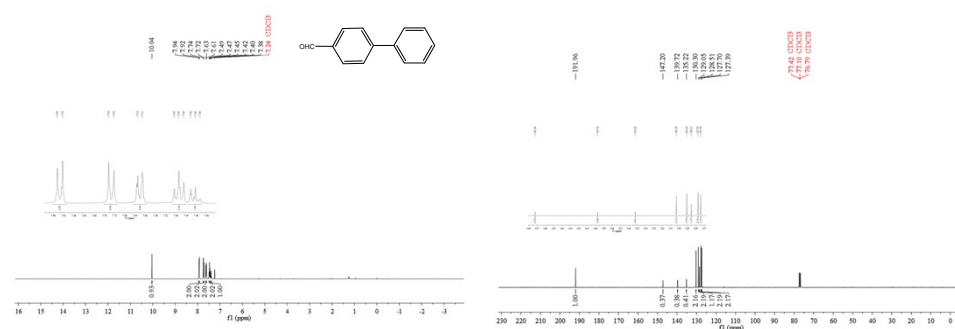

**Entry 9:**  $^1\text{H}$  NMR (400 MHz,  $\text{CDCl}_3$ ,  $\delta$  ppm): 10.04 (s, 1H), 7.93 (d,  $J = 8.3$  Hz, 2H), 7.73 (d,  $J = 8.3$  Hz, 2H), 7.62 (d,  $J = 7.1$  Hz, 2H), 7.47 (t,  $J = 7.4$  Hz, 2H), 7.40 (t,  $J = 7.3$  Hz, 1H);  $^{13}\text{C}$  NMR (101 MHz,  $\text{CDCl}_3$ ,  $\delta$  ppm): 191.96, 147.20, 139.72, 135.22, 130.30, 129.05, 128.51, 127.70, 127.39.

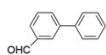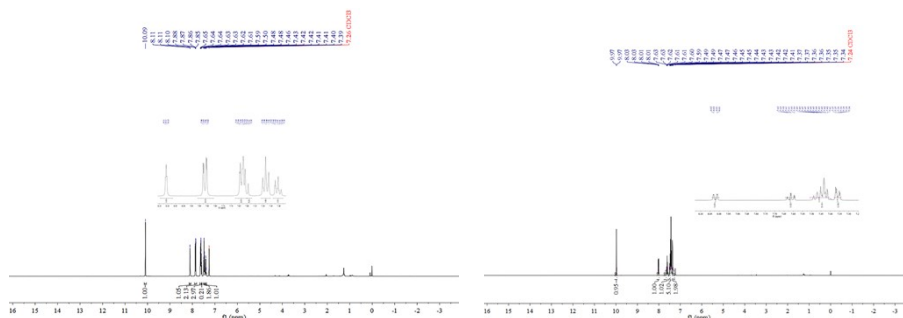

**Entry 10:**  $^1\text{H}$  NMR (400 MHz,  $\text{CDCl}_3$ ,  $\delta$  ppm) : 10.09 (s, 1H), 8.11 (dt,  $J = 1.8$  Hz, 1H), 7.86 (dd,  $J = 7.7, 1.8$  Hz, 2H), 7.67 (m, 2H), 7.60 (m, 1H), 7.48 (t,  $J = 7.5$  Hz, 2H), 7.44 – 7.38 (m, 1H);  $^{13}\text{C}$  NMR (101 MHz,  $\text{CDCl}_3$ ,  $\delta$  ppm) : 192.42, 142.26, 139.79, 137.03, 133.16, 129.60, 129.11, 128.73, 128.30, 128.12, 127.25.

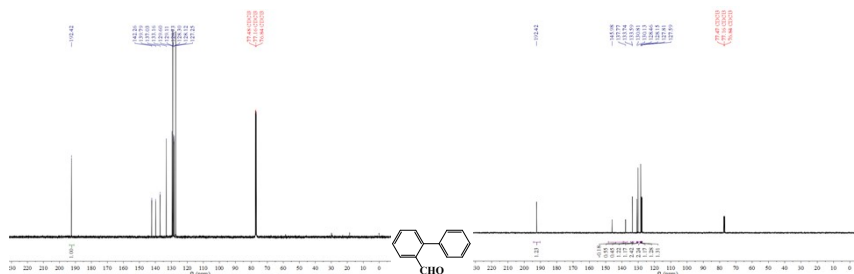

**Entry 11:**  $^1\text{H}$  NMR (400 MHz,  $\text{CDCl}_3$ )  $\delta$  9.97 (d,  $J = 0.7$  Hz, 1H), 8.02 (dd,  $J = 7.8, 1.3$  Hz, 1H), 7.64 – 7.59 (m, 1H), 7.51 – 7.41 (m, 5H), 7.38 – 7.34 (m, 2H);  $^{13}\text{C}$  NMR (101 MHz,  $\text{CDCl}_3$ ,  $\delta$  ppm): 192.42, 145.98, 137.77, 133.74, 133.59, 130.81, 130.13, 128.46, 128.15, 127.81, 127.59.

## Reference

- (1) M.L.N. Rao et al. A new palladium catalyzed protocol for atom-efficient cross-coupling reactions of triarylbismuths with aryl halides and triflates. *Tetrahedron*. 2008; 64: 5762–5772.
- (2) Rai RK, Gupta K, Behrens S, Li J, Xu Q, Singh Sanjay K. Highly Active Bimetallic Nickel–Palladium Alloy Nanoparticle Catalyzed Suzuki–Miyaura Reactions. *ChemCatChem*. 2015;7: 1806 – 1812.
- (3) Doustkhah E, Rostamnia S, Imura M. Thiourea bridged periodic mesoporous organosilica with ultra-small Pd nanoparticles for coupling reactions. *RSC Adv*. 2017; 7: 56306–56310.
- (4) Lü B, Fu CL, Ma SM. Application of a readily available and air stable monophosphine HBF<sub>4</sub> salt for the Suzuki coupling reaction of aryl or 1-alkenyl chlorides. *Tetrahedron Lett*. 2010; 51: 1284–1286.
- (5) Bao GG, Bai J, Li CP. Synergistic effect of the Pd–Ni bimetal/carbon nanofiber composite catalyst in Suzuki coupling reaction. *Org. Chem. Front*. 2019; 6: 352–361.
- (6) Mino T, Shirae Y, Sakamoto M, Fujita T. Phosphine-Free Hydrazone-Pd Complex as the Catalyst Precursor for a Suzuki–Miyaura Reaction under Mild Aerobic Conditions. *J. Org. Chem*. 2005, 70, 2191–2194.
- (7) Bandini M, Pietrangelo A, Sinisi R, Ronchi AU, Wolf MO. New Electrochemically Generated Polymeric Pd Complexes as Heterogeneous Catalysts for Suzuki Cross-Coupling Reactions. *Eur. J.*

Org. Chem. 2009; 3554–3561.
